# Supplementary material
Source: MDPI journal article supplement (https://www.mdpi.com/2072-4292/14/15/3645)
Supplement: s1 [file s1]

# Influences of Seasonal Soil Moisture and Temperature on Vegetation Phenology in the Qilian Mountains

Xia Cui <sup>1,\*</sup>, Gang Xu<sup>2</sup>, Xiaofei He<sup>2</sup>, Danqi Luo <sup>2</sup>

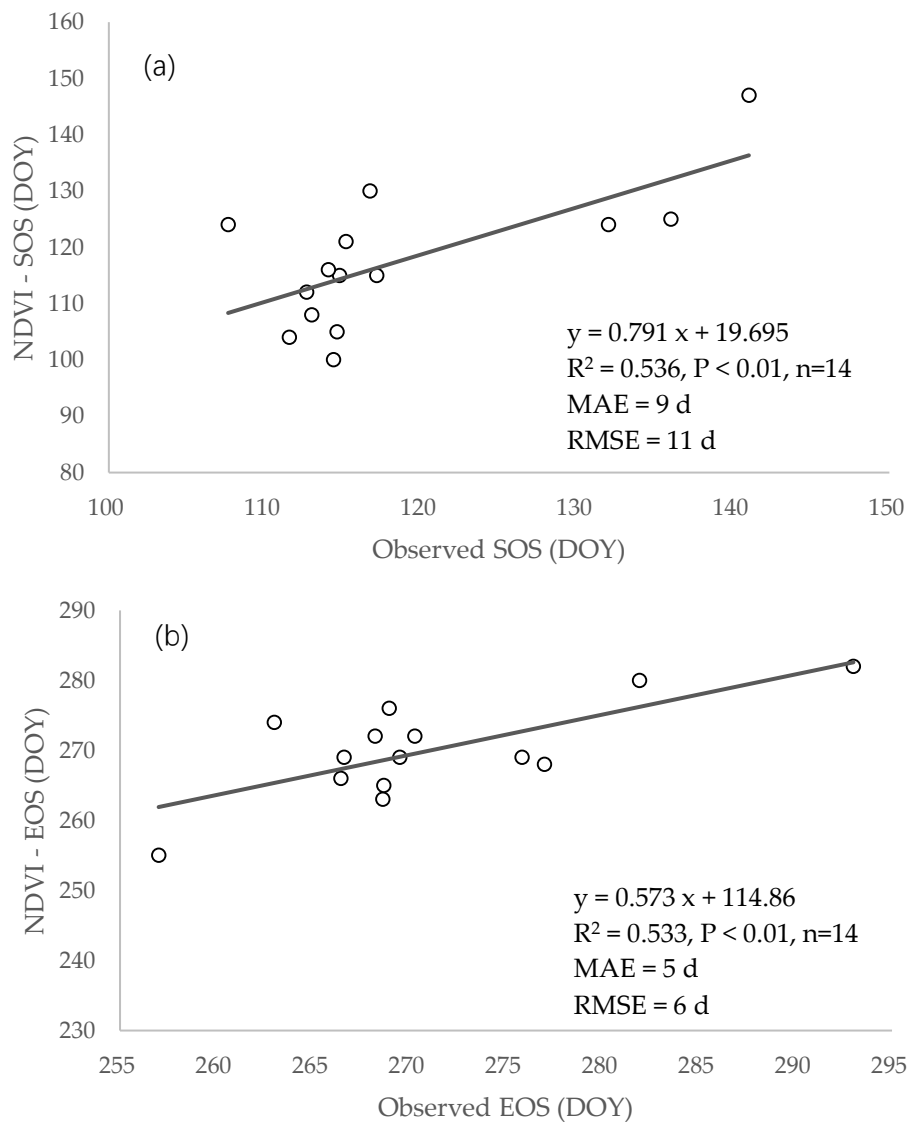

Figure S1. Comparison of satellite-derived phenology data with ground-based phenology data: (a) SOS; (b) EOS.
